# Supplementary material
Source: Elsevier journal article supplement (https://discovery.ucl.ac.uk/1471637/7/mmc1.pdf)
Supplement: mmc1 [file mmc1.pdf]

**MANUSCRIPT: SCR-D-14-00365**

**A matter of identity – phenotype and differentiation potential of human somatic stem cells**

New S.E.P\*, Alvarez-Gonzalez C\*, Vagaska B\*, Gomez S.G, Bulstrode N.W, Madrigal A, Ferretti P

**Supplementary Information**

**Extended Methods**

*Isolation and culturing of neural stem cells (NSCs)*

All procedures involving human tissue were carried out in accordance to the Human Tissue Act 2006. The human embryonic and fetal material was provided by the Joint MRC (grant G070089)/ Wellcome Trust (grant GR082557) Human Developmental Biology Resource (<http://hdbr.org>). The human neural stem cell lines (hNSC) lines were derived from brain and spinal cords from human embryos and fetuses between Carnegie stage (CS) 18 (gestation age 37–42 days) and CS22 (gestational age 54–56 days). Brains and spinal cords were dissected in cold Neurobasal-A medium (Gibco, #10888022) under aseptic conditions, meninges and blood vessels were removed using fine forceps and processed essentially as described by Sun et al 2008. In brief, the dissected tissues were minced and transferred into 0.5 ml accutase solution (Stem cell pro, Gibco, #A11105-01) using a sterile Pasteur pipette and incubated at 37°C for 5-10 minutes with occasional trituration with a P1000 pipette to obtain a single cell suspension. After digestion and trituration, the cells were centrifuged at 1000rpm for 5 minutes. This consisted RHB-A medium (Stem Cell Sciences Ltd, UK), supplemented with L-glutamine (2 mM final, Invitrogen), penicillin-streptomycin (10 mL/L final, Invitrogen), N2 (1X final, PAA), B27 (1X final, PAA), recombinant human FGF (20 ng/mL final, Peprotech), recombinant human EGF (20 ng/mL final Peprotech), Heparin Sulfate (5 µg/mL final, Sigma), Laminin L2020 (10 µg/mL final, Sigma) and BSA Fraction V (100 µg/mL final, Sigma). NSCs were split 1:2 or 1:3 every 3-4 days using accutase (Invitrogen).

### *Isolation and culturing of umbilical cord mesenchymal stem cells (UC-MSCs)*

Umbilical cord tissue was supplied by the Anthony Nolan Cell Therapy Centre (<http://www.anthonynolan.org/Healthcareprofessionals/Cord-blood-services.aspx>) from informed consent mothers with healthy full-term pregnancies. Tissue was processed within 6 hrs of birth. The cord tissue was rinsed with 1x PBS to remove as much blood as possible and then the blood vessels were removed. The remaining cord matrix or Wharton's Jelly was cut into much smaller pieces and placed into enzyme solution (0.5mg/ml of Hyaluronidase [Sigma] and 0.5mg/ml of Collagenase [Sigma]) and mixed on a MACS Mix™ Tube Rotator (Miltenyi) at 37°C for 1 hr. 0.125% Trypsin (Sigma) was added to the tissue and it was re-placed in the tube rotator at 37°C for 30 mins. The final product was passed through 70µm cell strainer (BD Bioscience), washed with 1x PBS, and centrifuged at 300g for 5 mins at RT. The resulting pellet was treated with ammonium chloride solution (STEMCELL TECHNOLOGIES) for 5 mins to lyse remaining RBC, washed with 1x PBS, centrifuged at 300g for 5 mins, and re-suspended in appropriate culture media.

### *Isolation and culturing of human adipose tissue-derived stem cells (ADSCs)*

ADSCs were prepared from surplus raw lipoaspirates (2-10 ml) of consented paediatric patients. Lipoaspirates were washed extensively with Phosphate-Buffered Saline (PBS, PAA Laboratories) and then incubated with two volumes of 0.05% trypsin/1mM EDTA (Life Technologies) in a 37°C shaking incubator for 1 hr. They were then centrifuged at 500 g for 5 minutes. After removing the supernatant and the floating mature adipocytes, cell pellets were incubated with red blood cell lysis buffer (Roche) at room temperature for 5 minutes and then centrifuged again. The so-called 'stromal vascular fraction' containing ADSCs was subsequently grown in proliferation medium consisting of DMEM high glucose (Life Technologies) supplemented with 10% ES-FBS (Embryonic Stem cell-qualified fetal bovine serum, Invitrogen), 2 mM glutamine and 1% penicillin/streptomycin (all from Life Technologies) at 37°C in a humidified incubator with 5% CO<sub>2</sub>.

### *Adipogenic differentiation - quantification*

Confluent ADSCs were incubated with a medium containing DMEM 10% ES-FBS, 10 ng/ml insulin, 500 mM 3-isobutyl-1-methylxanthine (IBMX), 1 mM dexamethasone, 1 mM rosiglitazone (Molekula). After three weeks, cells were fixed with 10% formalin, washed with 60% isopropanol for 5 minutes stained with Oil-Red O (0.25% w/v) for 10 minutes. After staining, cells were washed

several times with H<sub>2</sub>O. For quantification, the dye was extracted with 100% isopropanol for 30 minutes at room temperature and OD<sub>495</sub> determined with a plate reader (Bio-Rad).

#### Chondrogenic differentiation - quantification

Confluent ADSCs were incubated in a medium containing DMEM 10% ES-FBS, 0.1  $\mu$ M dexamethasone, 10 ng/ml Tgf $\beta$ 1 (R&D Systems), ITS (Life Technologies), 50  $\mu$ g/ml ascorbate. After three weeks, cells were fixed in 4% paraformaldehyde (PFA), rinsed with 0.1N HCl for 5 minutes and stained with Alcian Blue (1% in 0.1N HCl). For quantification, the dye was extracted with guanidine hydrochloride 6M overnight at room temperature and OD<sub>595</sub> determined.

#### *Osteogenic differentiation - quantification*

Confluent ADSCs were incubated in a medium containing DMEM 10% ES-FBS, 0.1  $\mu$ M dexamethasone, 100  $\mu$ g/ml ascorbate, 10 mM  $\beta$ -glycerophosphate. After three weeks, cells were fixed in ice-cold 70% ethanol for 1 hour, washed with H<sub>2</sub>O and stained with 1% Alizarin Red. For quantification, stained cells were incubated with 10% acetic acid for 30 minutes at room temperature, scraped, transferred to 1.5 ml vials, and heated at 85°C for 10 minutes. Debris was eliminated by centrifugation and the OD<sub>405</sub> of the supernatants determined.

**Supplemental Table 1.** Primary and secondary antibodies used in this study for immunohistochemistry/ immunocytochemistry.

| Antibody                                        | Species | Types | Dilution<br>[Amount of antibody]* |                           | Source                         |
|-------------------------------------------------|---------|-------|-----------------------------------|---------------------------|--------------------------------|
|                                                 |         |       | Cultured cells                    | Tissue                    |                                |
| <b>Primary</b>                                  |         |       |                                   |                           |                                |
| Vimentin                                        | Mouse   | IgG   | 1:100                             | 1:200                     | DAKO                           |
| $\alpha$ SMA                                    | Mouse   | IgG   | 1:200<br>[10 $\mu$ g/ml]          | 1:100<br>[20 $\mu$ g/ml]  | Abcam                          |
| Sox2                                            | Rabbit  | IgG   | 1:1000                            | 1:200                     | Millipore                      |
| Nestin                                          | Rabbit  | IgG   | 1:200                             | 1:400                     | Millipore                      |
| GFAP                                            | Rabbit  | IgG   | 1:1000                            | 1:400                     | Millipore                      |
| $\beta$ III-tubulin                             | Mouse   | IgG   | 1:1000<br>[1 $\mu$ g/ml]          | 1:400<br>[2.5 $\mu$ g/ml] | Promega                        |
| NF200                                           | Rabbit  | IgG   | 1:200<br>[40 $\mu$ g/ml]          | 1:100<br>[80 $\mu$ g/ml]  | Sigma                          |
| <b>Secondary</b>                                |         |       |                                   |                           |                                |
| anti-mouse IgG Alexa Fluor <sup>®</sup><br>488  | Donkey  | IgG   | 1:400 [5 $\mu$ g/ml]              |                           | Molecular probe,<br>Invitrogen |
| anti-rabbit IgG Alexa Fluor <sup>®</sup><br>488 | Donkey  | IgG   | 1:400 [5 $\mu$ g/ml]              |                           | Molecular probe,<br>Invitrogen |

\*The amount of antibody used has been indicated when available.

**Supplemental Table 2.** Conjugated antibodies used in this study for flow cytometry.

| Name                     | Fluorochrome    | Clone       | Isotype  | Dilution | Company         |
|--------------------------|-----------------|-------------|----------|----------|-----------------|
| Anti-GFAP                | PE              | 1B4         | IgG2b    | 1:20     | BD Pharmingen   |
| Anti-MAP2B               | AlexaFluor® 488 | 18/MAP2B    | IgG1, k  | 1:20     | BD Pharmingen   |
| Anti-Nestin              | PE              | 25/NESTIN   | IgG1, k  | 1:20     | BD Pharmingen   |
| Anti-O4                  | PE              | O4          | IgM      | 1:10     | R&D Systems     |
| Anti-Oct3/4              | PerCP-Cy 5.5    | 40/Oct-3    | IgG1, k  | 1:20     | BD Pharmingen   |
| Anti-Sox2                | AlexaFluor® 488 | 245610      | IgG2a    | 1:20     | BD Pharmingen   |
| Anti-βIII Tubulin        | AlexaFluor® 488 | TUJ1        | IgG2a    | 1:20     | BD Pharmingen   |
| CD10                     | FITC            | HI10a       | IgG1, k  | 1:5      | BD Pharmingen   |
| CD105                    | PE              | 266         | IgG1, k  | 1:20     | BD Pharmingen   |
| CD117                    | PE              | 104D2       | IgG1, k  | 1:5      | BD Pharmingen   |
| CD13                     | PE              | L138        | IgG1, k  | 1:5      | BD Pharmingen   |
| CD133                    | PE              | AC133       | IgG1     | 1:100    | Miltenyi Biotec |
| CD14                     | FITC            | MφP9        | IgG2b, k | 1:5      | BD Pharmingen   |
| CD140a (PDGFRα)          | PE              | αR1         | IgG2a, k | 1:5      | BD Pharmingen   |
| CD15 (SSEA-1)            | APC             | VIMC6       | IgM      | 1:10     | Miltenyi Biotec |
| CD166                    | PE              | 3A6         | IgG1, k  | 1:5      | BD Pharmingen   |
| CD184 (CXCR4)            | PE              | 12G5        | IgG2a, k | 1:5      | BD Pharmingen   |
| CD271 (LNGFR)            | FITC            | ME20.4-1.H4 | IgG1     | 1:10     | Miltenyi Biotec |
| CD29                     | PE              | MAR4        | IgG1, k  | 1:5      | BD Pharmingen   |
| CD31                     | FITC            | WM59        | IgG1, k  | 1:5      | BD Pharmingen   |
| CD34                     | APC             | 581         | IgG1, k  | 1:50     | BD Pharmingen   |
| CD44                     | PE              | 515         | IgG1, k  | 1:5      | BD Pharmingen   |
| CD45                     | FITC            | 5B1         | IgG2a    | 1:10     | Miltenyi Biotec |
| CD73                     | PE              | AD2         | IgG1, k  | 1:5      | BD Pharmingen   |
| CD90                     | FITC            | 5E+10       | IgG1, k  | 1:100    | BD Pharmingen   |
| HLA-A,-B,-C              | PE              | G46-2.6     | IgG1, k  | 1:5      | BD Pharmingen   |
| HLA-DR, DP, DQ           | FITC            | Tu39        | IgG2a, k | 1:5      | BD Pharmingen   |
| IgG1, k Isotype Control  | FITC            | MOPC-21     | IgG1, k  | 1:5      | BD Pharmingen   |
| IgG1, k Isotype Control  | PE              | MOPC-21     | IgG1, k  | 1:5      | BD Pharmingen   |
| IgG2a, k Isotype Control | FITC            | G155-178    | IgG2a, k | 1:5      | BD Pharmingen   |
| IgG2b, k Isotype Control | FITC            | 27-35       | IgG2b, k | 1:5      | BD Pharmingen   |
| SSEA-4                   | FITC            | MC813-70    | IgG3     | 1:5      | BD Pharmingen   |
| SSEA-4                   | PE              | MC813-70    | IgG3     | 1:5      | BD Pharmingen   |
| Vimentin                 | PE              | RV202       | IgG1     | 1:20     | BD Pharmingen   |

**Supplemental Table 3.** Primers used for RT-qPCR

| <b>Gene</b>         | <b>Primers (5'-3')</b>                                       |
|---------------------|--------------------------------------------------------------|
| Eag1                | For TGGATTTTGCAAGCTGTCTG<br>Rev GAGTCTTTGGTGCCTCTTGC         |
| GAPDH               | For TGATGACATCAAGAAGGTGGTGAAG<br>Rev TCCTTGGAGGCCATGTGGGCCAT |
| GFAP                | For GAAGCTCCAGGATGAAACCA<br>Rev ACCTCCTCCTCGTGGATCTT         |
| NSE                 | For CTGATGCTGGAGTTGGATGG<br>Rev CCATTGATCACGTTGAAGGC         |
| p0                  | For CCAGCTTTGCCCTGTGGGT<br>Rev AGTGTGCACGACGCTGAGCC          |
| SOX2                | For CATGTCCCAGCACTACCAGA<br>Rev GTCATTTGCTGTGGGTGATG         |
| CD133<br>(prominin) | For CAGAGTACAACGCCAAACCA<br>Rev AAATCACGATGAGGGTCAGC         |
| Oct4                | For GTA CTCCTCGGTCCCTTTCC<br>Rev CAAAACCCTGGCACAAACT         |
